# Supplementary material
Source: publisher site journal article supplement (https://www.dovepress.com/get_supplementary_file.php?f=354127.docx)
Supplement: Supplementary file 1 [file get_supplementary_file.php]

**Supporting Information for**

**Biomimetic Mineralized Hydroxyapatite Nanofiber-Incorporated Methacrylated Gelatin Hydrogel with Improved Mechanical and Osteoinductive Performances for Bone Regeneration**

He Wang1,*

Bo Hu1,*

Hong Li2

Ge Feng1

Shengyuan Pan1

Ziqi Chen1

Bo Li2

Jinlin Song1

1 Stomatological Hospital of Chongqing Medical University, Chongqing Key Laboratory of Oral Diseases and Biomedical Sciences, Chongqing Municipal Key Laboratory of Oral Biomedical Engineering of Higher Education, Chongqing, China; 2 Chongqing Engineering Laboratory of Nano/Micro Biomedical Detection Technology, Chongqing University of Science and Technology, Chongqing, China.

* These authors contributed equally to this work

Correspondence: Bo Li; Jinlin Song.

Chongqing Engineering Laboratory of Nano/Micro Biomedical Detection Technology, Chongqing University of Science and Technology, Chongqing 401331, P.R. China; College of Stomatology, Chongqing Medical University. 426# Songshibei Road, Yubei District, Chongqing 401147, P.R. China.

Tel +86-23-8886-0026

Fax +86-23-8886-0222

Email [Libo@cqust.edu.cn](mailto:Libo@cqust.edu.cn); songjinlin@hospital.cqmu.edu.cn.


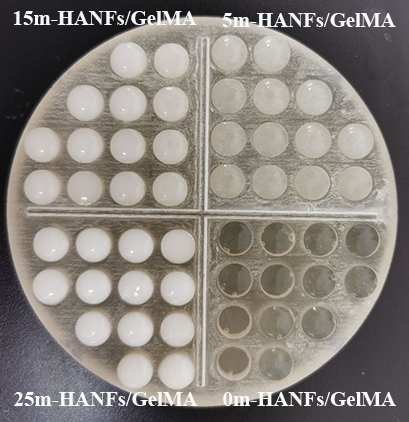


Figure S1：Digital photo of the mixture was transferred to a homemade resin mold to form the m-HANFs/GelMA hydrogel with different m-HANFs contents.


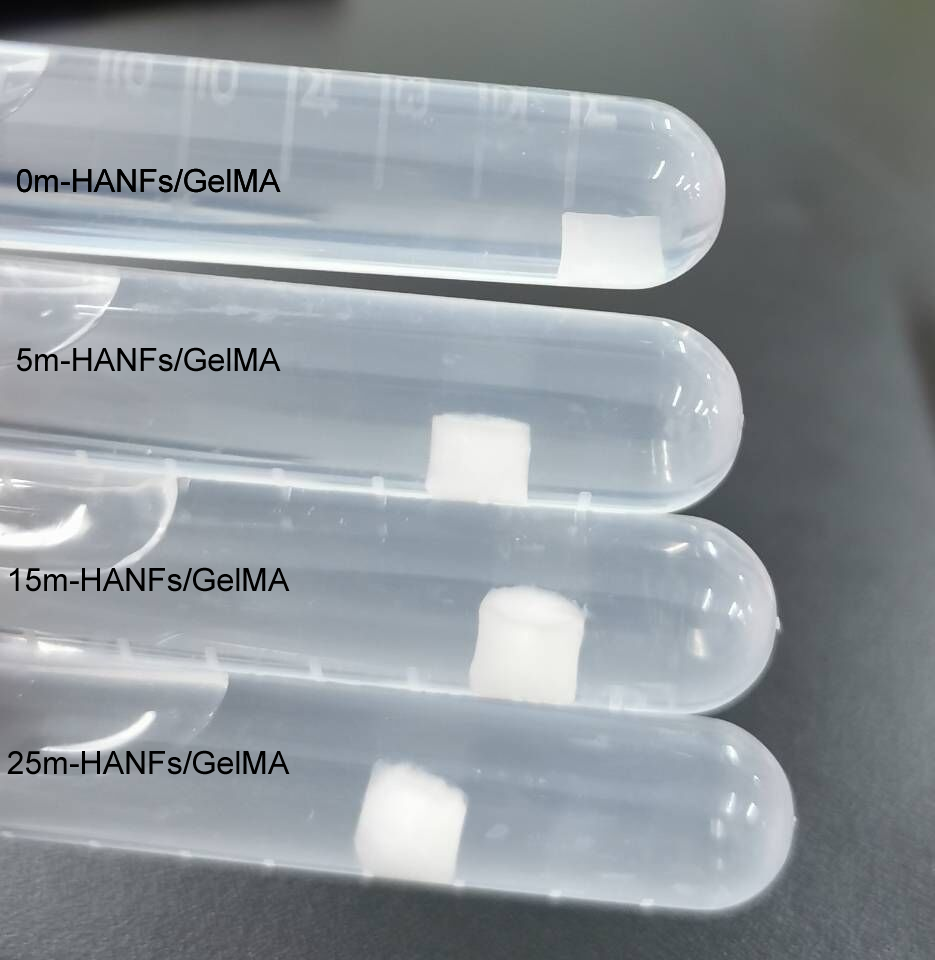


Figure S2: Digital photo of m-HANFs/GelMA composite hydrogels in a 7 mL PBS buffer for degradation test after 7 days.


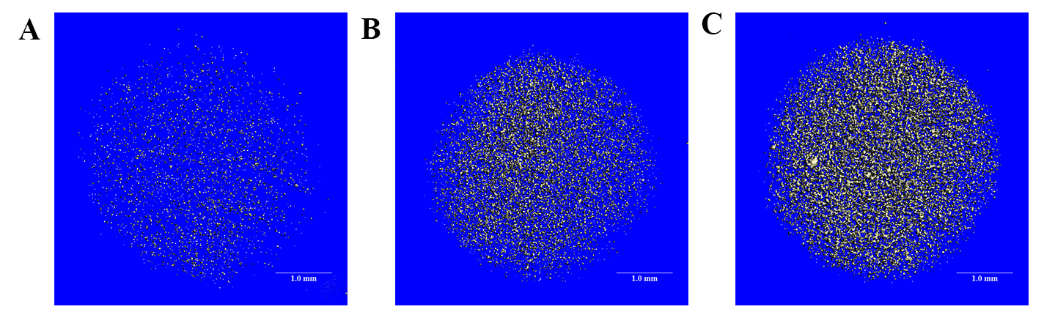


Figure S3: Top view of the micro-CT 3D reconstruction of m-HANFs/GelMA. A. 5m-HANFs/GelMA; B. 15m-HANFs/GelMA; C. 25m-HANFs/GelMA.


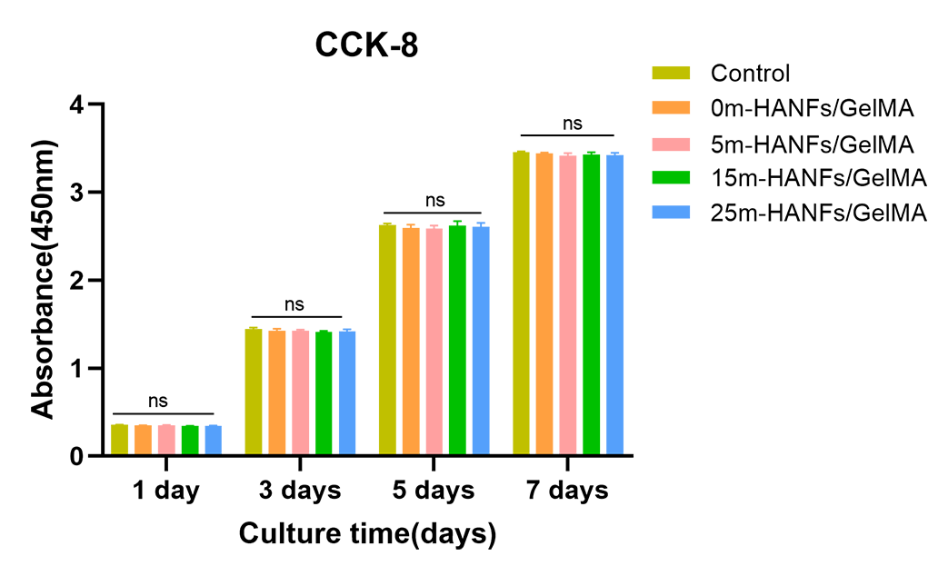


Figure S4: Proliferation of rat bone marrow

mesenchymal stem cells (rBMSCs) cocultured with m-HANFs/GelMA hydrogels of different m-HANF contents after culturing for 1, 3, 5, and 7 days. Data are presented as the mean ± SD (n = 3).


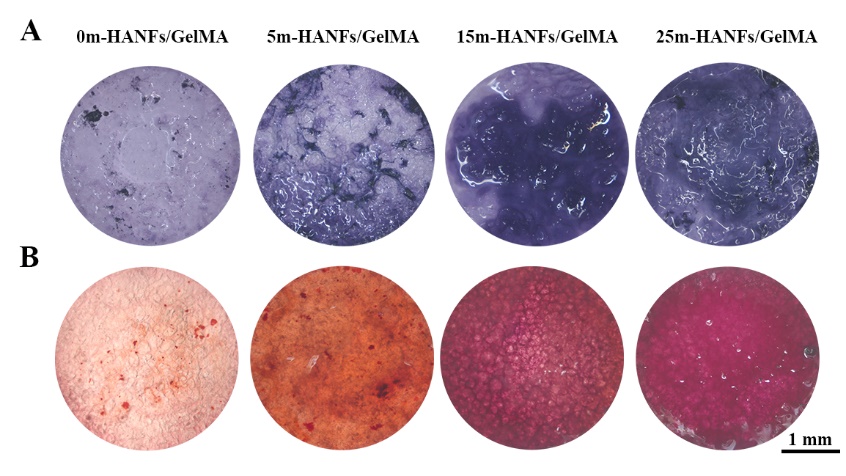


Figure S5: (A) ALP and (B) alizarin red staining images of rBMSCs cultured on m-HANFs/GelMA hydrogels with different m-HANF contents for 7 and 21 days, respectively.
